# Supplementary material
Source: PubMed Central journal article supplement (PMC2736683)

**Supporting Information for the manuscript entitled:**

***Campylobacter jejuni* PglH is a Single Active Site Processive Polymerase that Utilizes Product Inhibition to Limit Sequential Glycosyl Transfer Reactions**

*Jerry M. Troutman, Barbara Imperiali\**

Supporting Scheme 1. Biosynthesis of the Pgl enzyme substrates and products

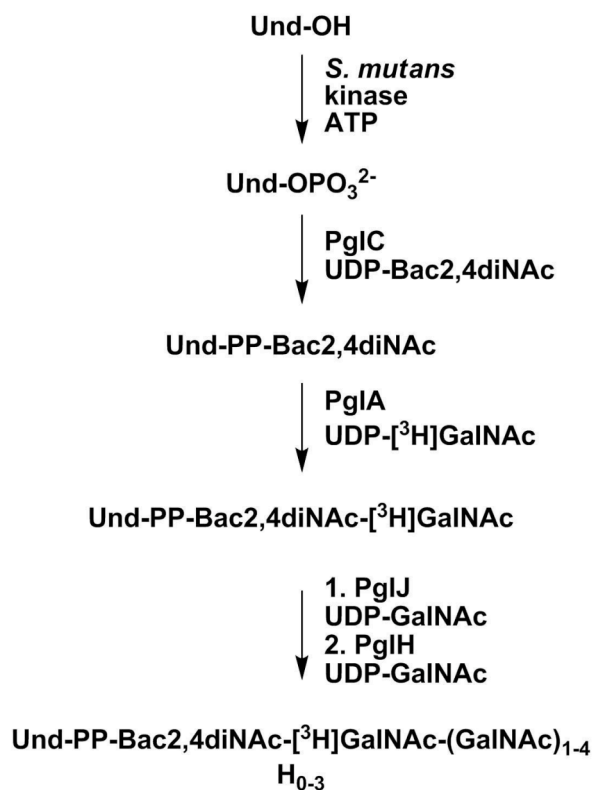

Supporting Scheme 2. Design of the dual label interference assay.

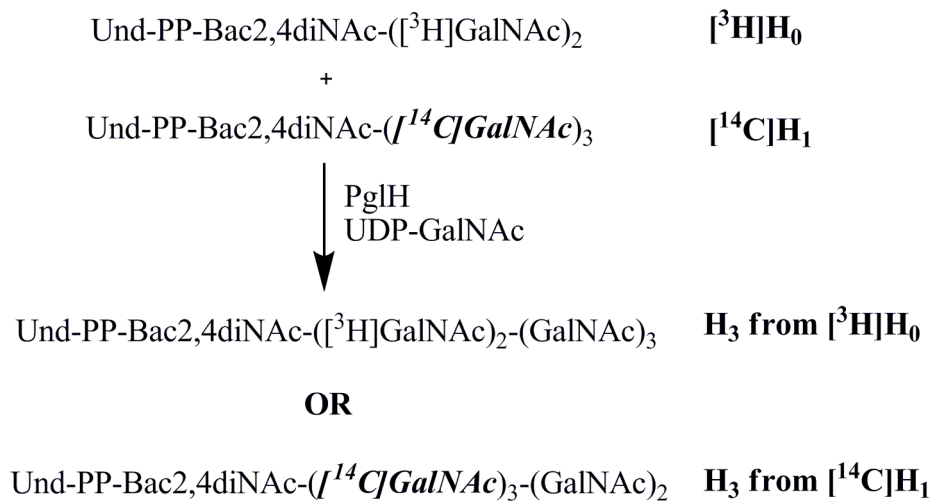

## Supporting Figure 1

PglH mutagenesis forward primers in bold capital is the mutation

E41A: 5'-gtattattaaattcatgcaggag**C**atcttttataagcttga~~aa~~atg-3'

E49A: 5'-cttttataagctt**C**aatgaagttaaagttacaagtttg-3'

E171A: 5'-cctgtcattttagcgatg**C**aattcttttgattc-3'

E179A: 5'-gattctagttt**C**aaaggaaaattggttcttttatagg-3'

E265A: 5'-gcctttgtcttttag**C**gggttgccaacggtttaattg-3'

E273A: 5'- gccaacggtttaatt**C**aagttgtatttgagg-3'

E308A: 5'-gatgggctttgtaggttgtgatgatgcaatag**C**acttgctaaaaactgaac-3'

E316A: 5'- ggctttgtaggttgtgatgatgaaatagcacttgctaaaaactg**C**actgttttaaatgatg-3'

E346A: 5'- ctcatatcaaag**C**agaatggcttaagc-3'

E354A: 5'- ggcttaagcttatagccg**C**ggttaaaaatgccc-3'

R191A: 5'-ggaaaattggttcttttataggg**G**Ctttagatcacaacaaaaaccctgtaatgttttaaaagc-3'

Supporting Figure 2 EX<sub>7</sub>E motifs in the PglC, A, J and H enzymes

**PglC**

1 MYEKVFKRIF DFILALVLLV LFSPVILITA LLLKITQGSV IFTQNRPLD EKIFKIYKFK  
 61 TMSDERDE**EKG ELLSDEL**RLK AFGKIVRSLS LDELLQLFNV LKGDMSEVGP RPLLV**EYLSL**  
 121 **YNEEQ**KLRHK VRPGITGWAQ VNGRNAISWQ KKFELDVYYV KNISFLDLK IMFLTALKVL  
 181 KRSGVSKEGH VTTEKFNGKN

**PglA**

1 MRIGFLSHAG ASIIYFRMPI IKALKDRKDE VVIVVPQDEY TQKLRDLGLK VIVYELSRAS  
 61 LNPVVVLKNF FYLAKVLKLN NLDLIQSAAH KSNTFGILAA KWAKIPYRFA LVEGLGSFYI  
 121 DQGFKANLVR FVINNLYKLG FKFAHQFIFV NESNAEFMRN LGFKESKICV IKSVINLKK  
 181 FFPIYVESEK KELFWKLNLI DKKPIVLMIA RALWHKGVKE FYESATMLKD KANFVLVGG  
 241 **DENPSCASLE** FLNSGVVHYL GARSDIVELL QNCDFVLPV **YKEGFPVSVL EAKACGKAIV**  
 301 VSDCEGCVEA ISNAYDGLWA KTKNAKDLSE KISLLEDEK LRLNLAKNAA QDALQYDINN  
 361 IAQRYLKLYD RVIKNV

**Pgl J**

1 MQKLGIFIYS LGSGGAERVV ATLLPILSLK FEVHLILMND KISYEIPECQ IHFLECSKPS  
 61 ENPILKFLKL PFLALKYKKL CRNLGIDTEF VFLNRPNYIA LMARMFGNKT RLVINECTTP  
 121 SVMYMKNNFN SLVNKFLISL LYPKADLILP NSKGNLEDLV QNFSISPCC EILYNAIDLE  
 181 **NIGQKALE**DI ALKDKFILSV GRLDKGNHA LLIRAYARK TDLKLVILGE GVLKDELLAL  
 241 IKELNLEEKV LLLGFDNNPY KYMAKCEFFA FASVF**EGFSN VLIES**LACSC AVVCTDHKSG  
 301 ARELFGDDEF GLLVEVDNEN SMFQGLKTM EDDKLRKAYK NKAKTAKAF DKVKIARDAL  
 361 KYLLG

**Pgl H**

1 MKISFIIATL NSGGAERVLV TLVNALCKEH EVSIIKFHAG **ESFYKLENEV** KVTSLQFRF  
 61 DTLYHKIASR FKKFFALRKA LKESKADVFI SFLDTTNIAC IAAKIGFKTP LIISEHSNEA  
 121 YLKPKIWRFL RRVSYFPCDA LSVLGSSDKV YVERFVKRVR LLLNPCHFSD **EIPFDSSEK**  
 181 ENLVLFIGRL DHNKNPAMFL KAIAHLDKNL QENYKFVIAG DGELRQELEY KVKSLGIKVD  
 241 FLGRVENVKT LYEKAKVLCL CSFV**EGLPTV LIES**LYFEVC RISSSYNGA KDLIKDNHDG  
 301 LLIGCDD**EIA LAKKLE**LVLN NENFRKELVN NAKQRCKDFE ISHIK**EEWLK LIAE**VKNA

### Supporting Figure 3

Threaded model in which the amino acid sequence of PglH has been threaded into the structure of PimA. E265 (red spheres), E273 (red spheres) and R191 (orange spheres) were all inactive and appear at the hypothesized active site, while all other alanine mutants E41, E49, D170, E171, E179, D306, D307, E308, E316, E346, and E354 (yellow ball and stick) had no major effect on activity.

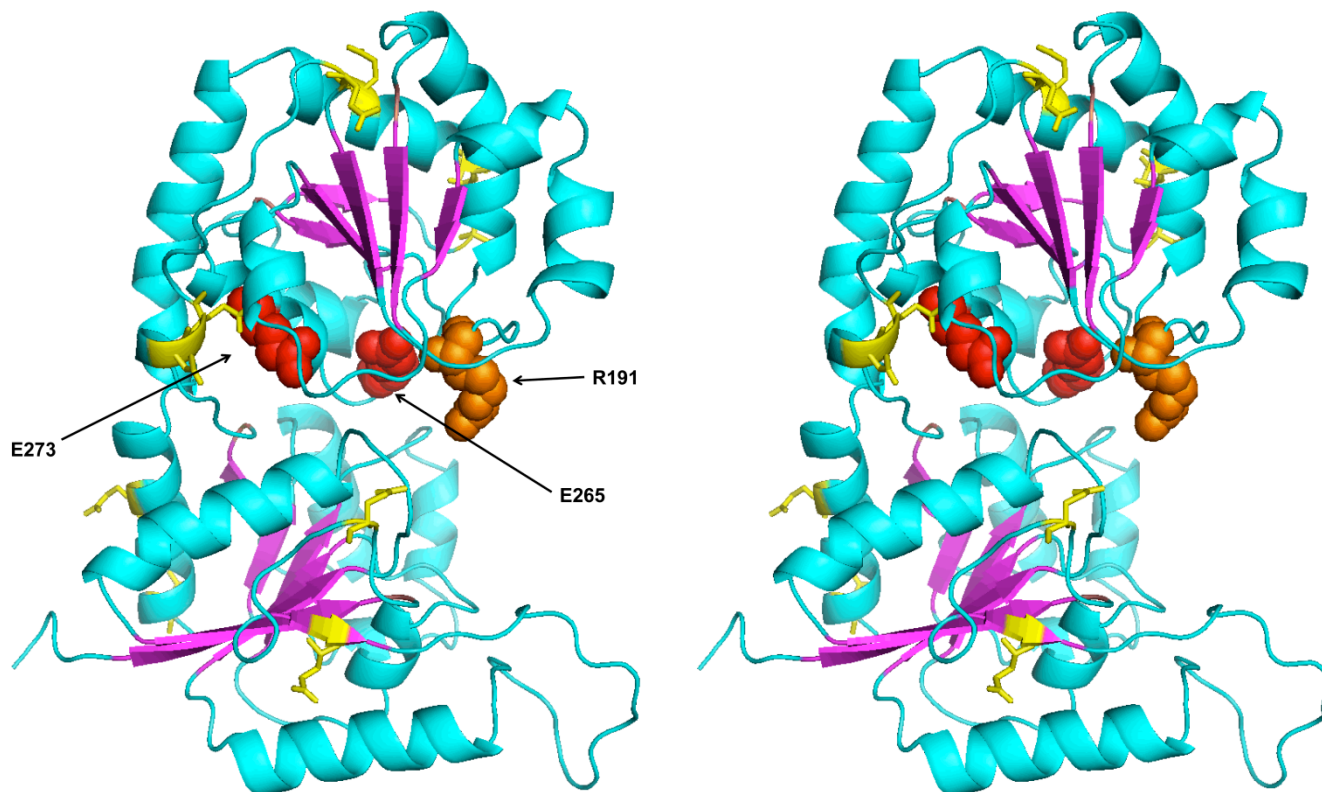

Supplement: NIHMS94511-supplement-1_si_001.pdf [file NIHMS94511-supplement-1_si_001.pdf]
